# Supplementary material for: Knocking Down CDKN2A in 3D hiPSC-Derived Brown Adipose Progenitors Potentiates Differentiation, Oxidative Metabolism and Browning Process
Source: MDPI journal article supplement (doi:10.3390/cells12060870), 2023-03-10
Supplement: s1 [file s1]

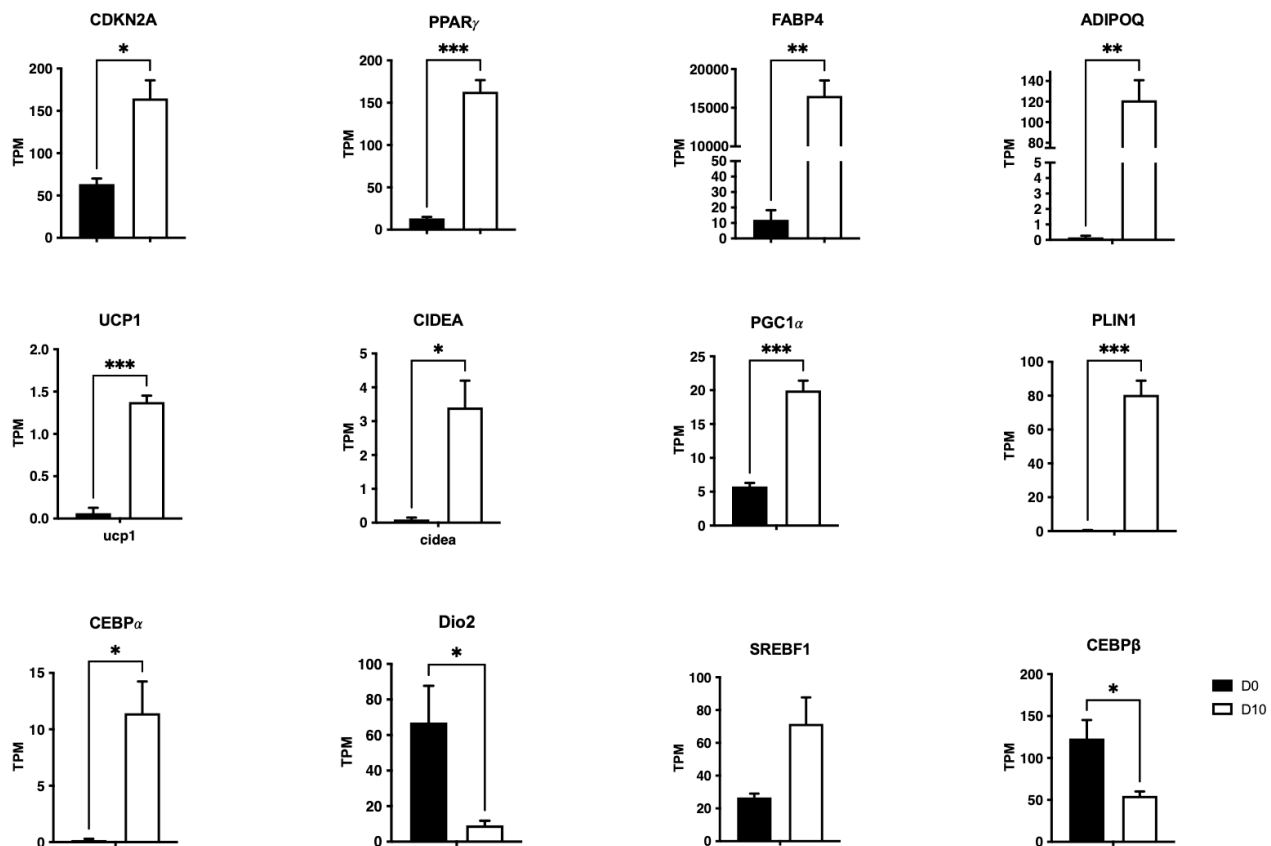

Figure S1. Comparative analysis of mRNA expression levels (i.e., Transcripts Per Million (TPM)) between D0 spheroids and D10 adipospheres in 3D hiPSC-BAPs.

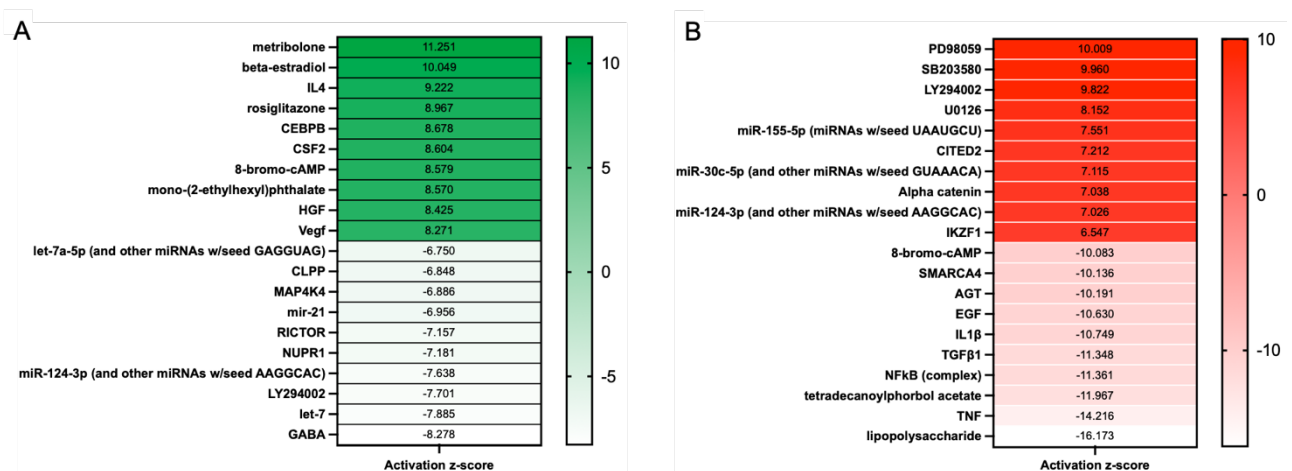

Figure S2. Upstream regulator analysis of differentially regulated pathways in 10 days-differentiated 3D adipospheres (D10 vs D0). (A) Upstream regulators of up-regulated pathways. (B) Upstream regulators of down-regulated pathways.

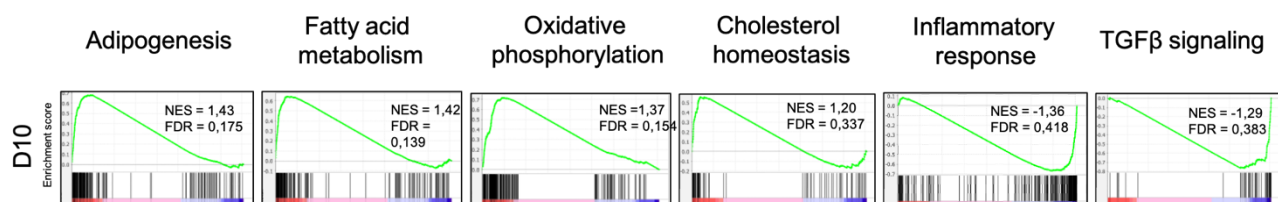

Figure S3. Gene set enrichment pathway analysis (GSEA)-enrichment plots of representative gene sets from differentially regulated gene expression in 10 days-differentiated 3D adipospheres (D10 vs D0).

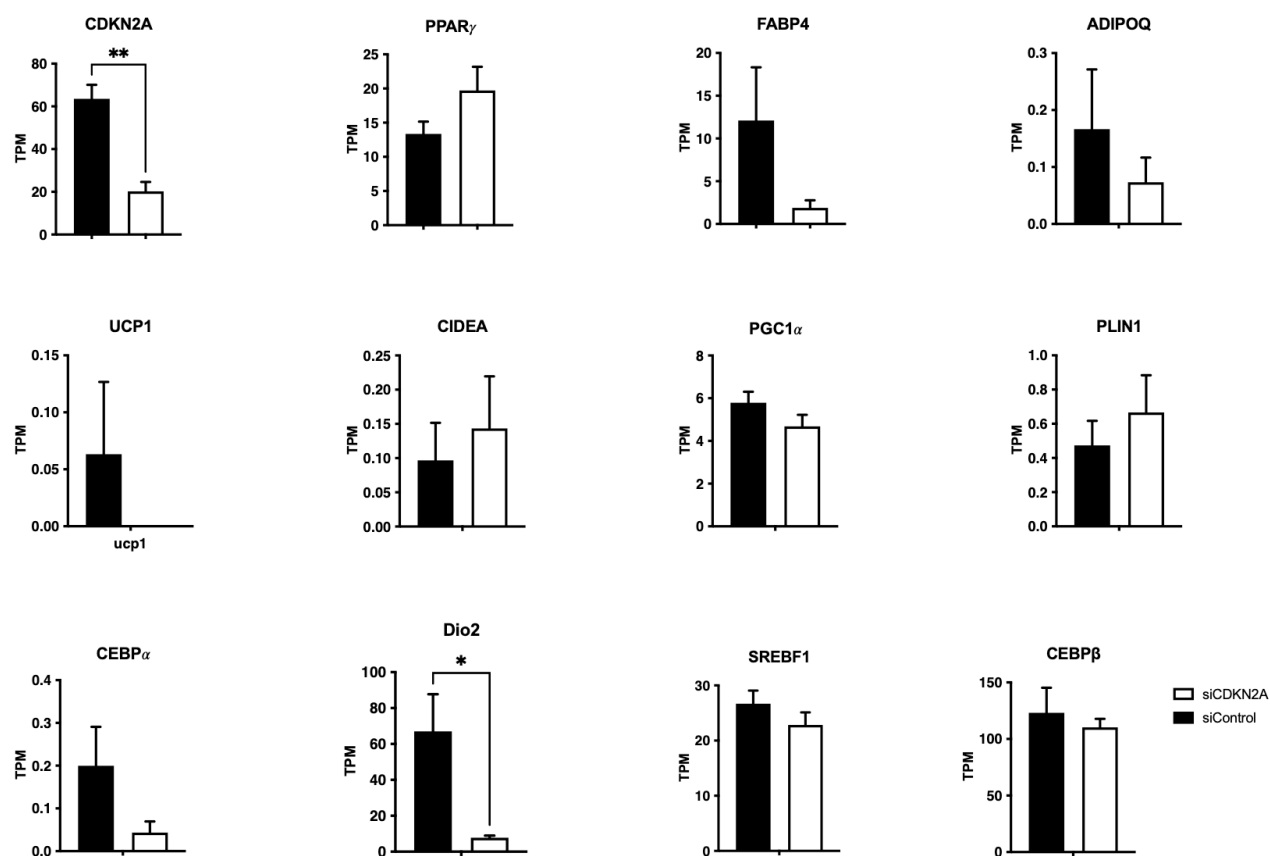

Figure S4. Comparative analysis of mRNA expression levels (i.e., Transcripts Per Million (TPM)) between control and CDKN2A-deficient D0 spheroids in 3D hiPSC-BAPs.

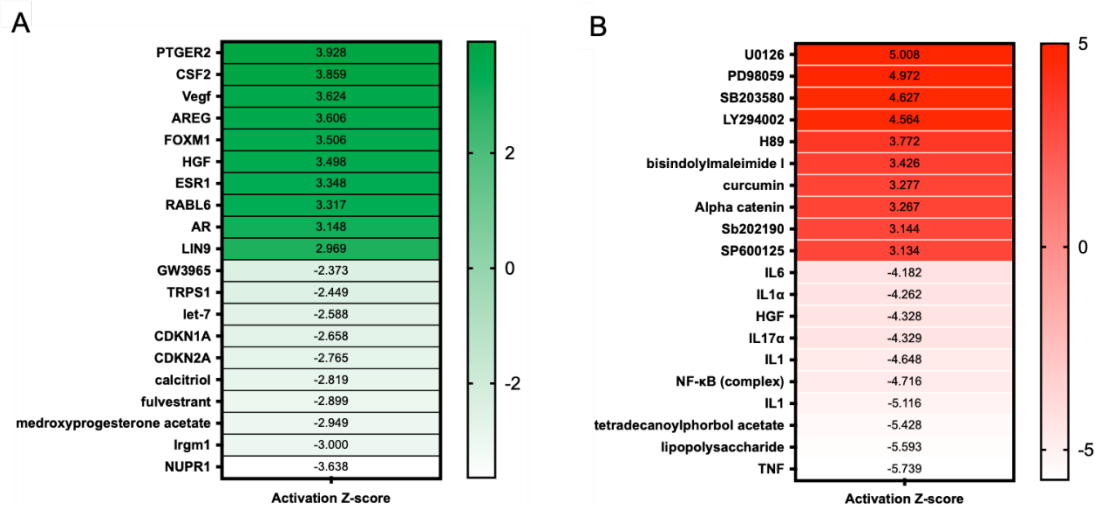

Figure S5. Upstream regulators analysis of differentially regulated pathways between control and CDKN2A-deficient D0 spheroids. (A) Upstream regulators of up-regulated pathways. (B) Upstream regulators of down-regulated pathways.

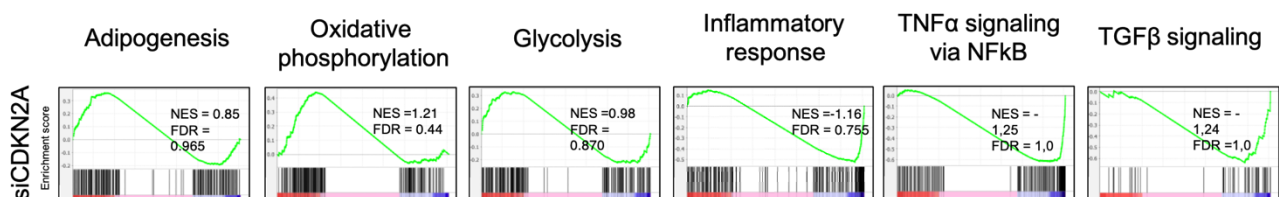

Figure S6. Gene set enrichment pathway analysis (GSEA)-enrichment plots of representative gene sets from differentially regulated gene expression between control and CDKN2A-deficient D0 spheroids.

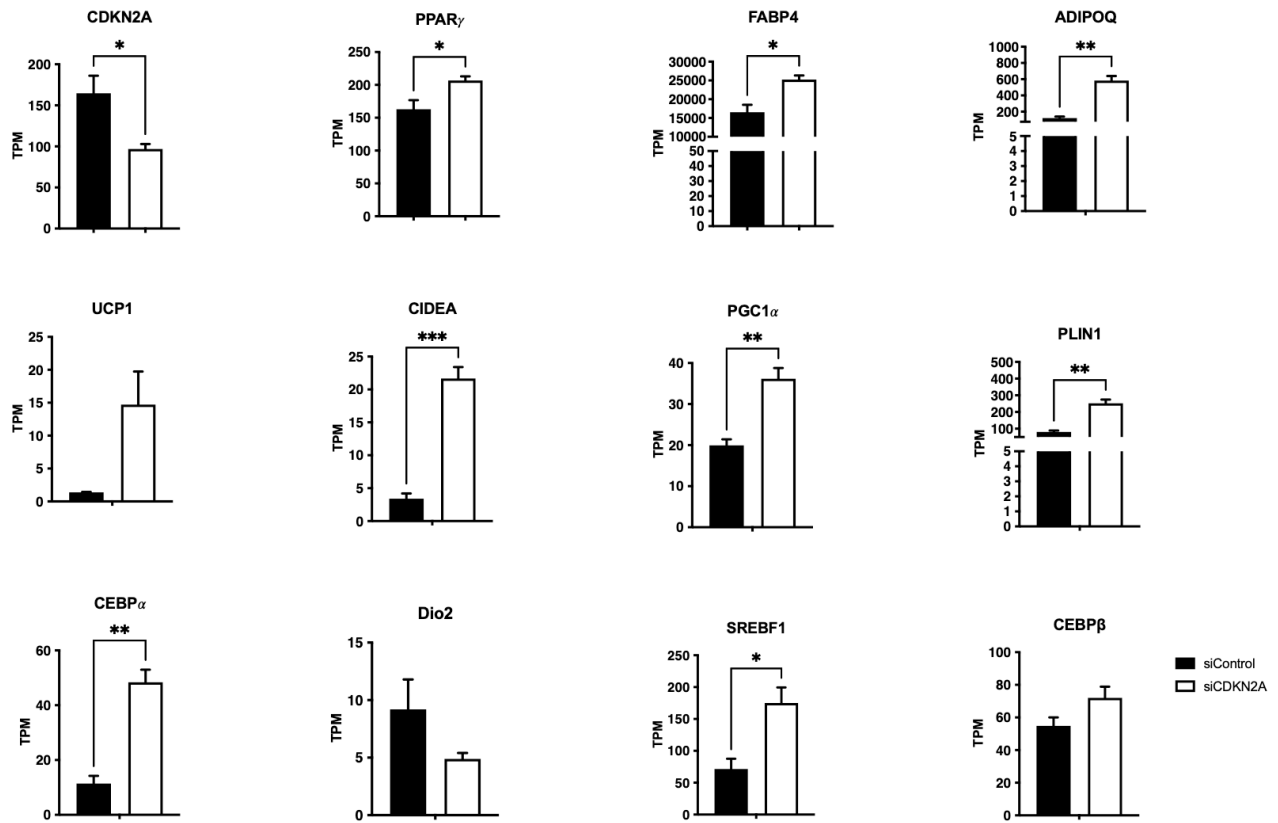

Figure S7. Comparative analysis of mRNA expression levels (i.e., Transcripts Per Million (TPM)) between control and CDKN2A-deficient D10 adipospheres in 3D hiPSC-BAPs.

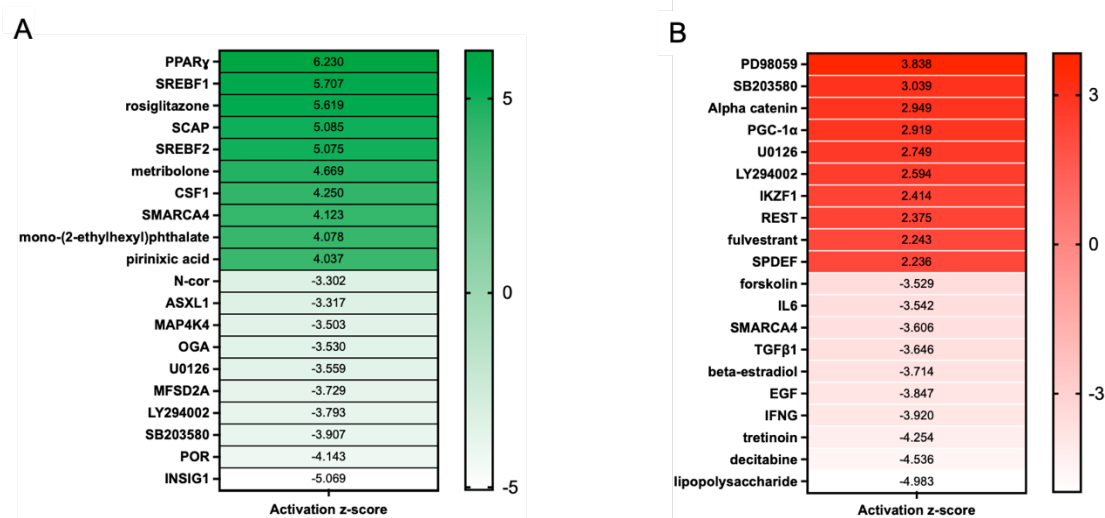

Figure S8. Upstream regulator analysis of differentially regulated pathways between control and CDKN2A-deficient D10 adipospheres. (A) Upstream regulators of up-regulated pathways. (B) Upstream regulators of down-regulated pathways.

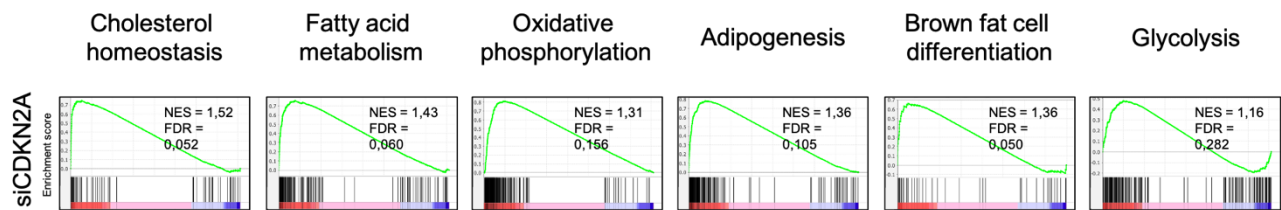

**Figure S9.** Gene set enrichment pathway analysis (GSEA)-enrichment plots of representative gene sets from differentially regulated gene expression between control and CDKN2A-deficient D10 adipospheres.

| Rank | PTK Kinase Name | Mean Final Score | Mean Kinase Statistic |
|------|-----------------|------------------|-----------------------|
| 1    | BLK             | 2,587897505      | -3,851509751          |
| 2    | FGFR1           | 2,434166938      | -4,729220701          |
| 3    | Lck             | 2,276231552      | -3,122426279          |
| 4    | FGFR4           | 2,192615108      | -3,741560736          |
| 5    | FGFR2           | 2,161490566      | -3,902745721          |
| 6    | FGFR3           | 2,129061326      | -3,938490642          |
| 7    | Yes             | 2,114281846      | -3,048435562          |
| 8    | Arg             | 2,111499894      | -2,817203637          |
| 9    | HCK             | 2,106587086      | -2,853751317          |
| 10   | Syk             | 2,068883214      | -2,49305365           |
| 11   | FmS/CSFR        | 2,021075341      | -4,428963             |
| 12   | Src             | 1,994184101      | -2,767348433          |
| 13   | Ret             | 1,834551184      | -3,046858301          |
| 14   | HER4            | 1,775512349      | -3,083931408          |
| 15   | KDR             | 1,769444569      | -2,993196455          |
| 16   | Abl             | 1,75558178       | -2,483894014          |
| 17   | HER2            | 1,727397176      | -2,78107761           |
| 18   | EphA4           | 1,721673581      | -2,700252455          |
| 19   | Brk             | 1,70960674       | -2,453540913          |
| 20   | TRKC            | 1,68861498       | -3,001516888          |
| 21   | ZAP70           | 1,680060954      | -2,412086269          |
| 22   | TRKB            | 1,675522302      | -2,863176951          |
| 23   | FLT4            | 1,671157552      | -2,898290776          |
| 24   | Fer             | 1,6622124        | -2,911329189          |
| 25   | EphA2           | 1,660536394      | -2,576904562          |
| 26   | ALK             | 1,651085962      | -2,431505901          |
| 27   | Axl             | 1,613139284      | -2,429260085          |
| 28   | TXK             | 1,588563821      | -2,275540567          |
| 29   | Mer             | 1,535486364      | -2,349181745          |
| 30   | TRKA            | 1,493395938      | -2,389443881          |
| 31   | HER3            | 1,484588524      | -2,355913006          |
| 32   | EphA8           | 1,434319005      | -1,990553879          |
| 33   | Kit             | 1,406791102      | -2,165697741          |
| 34   | Fyn             | 1,395468092      | -2,081310579          |
| 35   | FAK1            | 1,366390088      | -2,160388369          |
| 36   | EphA1           | 1,363065651      | -1,878133766          |
| 37   | TEC             | 1,343937478      | -2,091579999          |
| 38   | Met             | 1,339364338      | -2,125280344          |
| 39   | FAK2            | 1,313622961      | -2,108979832          |
| 40   | EphA5           | 1,313363731      | -1,747545347          |
| 41   | EGFR            | 1,304298011      | -2,14383432           |

| Rank | STK Kinase Name | Mean Final Score | Mean Kinase Statistic |
|------|-----------------|------------------|-----------------------|
| 1    | ERK1            | 3,440334482      | -0,863973328          |
| 2    | ERK2            | 3,390530996      | -0,823225582          |
| 3    | CDK2            | 2,777646678      | -0,697106888          |
| 4    | ERK5            | 2,71681798       | -0,795082149          |
| 5    | CDK4            | 2,654324419      | -0,876872073          |
| 6    | AlphaK1         | 2,649055128      | -1,206198271          |
| 7    | CDK6            | 2,534908645      | -0,904526514          |
| 8    | CDK11           | 2,510755801      | -1,034229499          |
| 9    | CDKL5           | 2,497973893      | -0,995168141          |
| 10   | p38[gamma]      | 2,414115588      | -0,818466189          |
| 11   | p38[beta]       | 2,369713449      | -0,907410647          |
| 12   | p38[delta]      | 2,344169093      | -0,656678685          |
| 13   | CDK7            | 2,253681934      | -0,66645641           |
| 14   | ERK7            | 2,242300375      | -1,013376722          |
| 15   | JNK1            | 2,128848493      | -0,589416351          |
| 16   | JNK3            | 2,08478833       | -0,589779677          |
| 17   | DAPK3           | 2,082599532      | -0,964958792          |
| 18   | MAPK14          | 1,885650254      | -0,591183929          |
| 19   | JNK2            | 1,884196885      | -0,605353358          |
| 20   | ICK             | 1,867484165      | -0,807577604          |
| 21   | CDC2/CDK1       | 1,840782433      | -0,593473044          |
| 22   | CDK3            | 1,760787807      | -0,583485707          |
| 23   | CDK5            | 1,7486884        | -0,575221591          |
| 24   | TBK1            | 1,582086776      | -0,730407142          |
| 25   | CDKL1           | 1,513518422      | -0,57495913           |
| 26   | PAK1            | 1,503421862      | -0,701768133          |
| 27   | NuaK1           | 1,499836525      | -0,570182551          |
| 28   | CDKL2           | 1,447380447      | -0,683231764          |
| 29   | CDK9            | 1,376068794      | -0,414469919          |

**Table S1. Kinases score table (PTK and STK) of D0 spheroids vs D10 adipospheres.**

| Peptides                  | STK/PTK | LFC        | Pvalue   |
|---------------------------|---------|------------|----------|
| ARAF_297_307              | PTK     | -0,6134956 | 8,50E-04 |
| PDCD1_221_229_FS219_220KK | PTK     | -1,133137  | 2,70E-03 |
| VGFR3_1061_1073           | PTK     | -1,6498542 | 7,12E-03 |
| PTN11_57_67               | PTK     | -0,9472599 | 7,42E-03 |
| AKT1_309_321_C310S        | PTK     | -0,624779  | 8,26E-03 |
| AKT1_320_332              | PTK     | -1,6804954 | 9,42E-03 |
| MK10_216_228              | PTK     | -0,5112407 | 1,42E-02 |
| RAF1_332_344              | PTK     | -0,5062263 | 1,75E-02 |
| PRRX2_202_214             | PTK     | -0,5016437 | 2,43E-02 |
| BTLA_252_262              | PTK     | -0,6638995 | 2,95E-02 |
| MK12_180_189_M182B        | PTK     | -0,3855168 | 3,59E-02 |
| TYK2_1048_1060            | PTK     | -0,3830287 | 3,79E-02 |
| ZAP70_485_497             | PTK     | -0,8363056 | 4,16E-02 |
| FGFR1_761_773             | PTK     | -2,0622191 | 4,95E-02 |
| RB_242_254                | STK     | 2,04E-02   | 5,40E-03 |
| RAP1B_172_184             | STK     | -0,5611579 | 2,41E-02 |
| CD27_212_224              | STK     | -0,2998864 | 3,85E-02 |
| FRAP_2443_2455            | STK     | -0,1546803 | 4,01E-02 |
| ADDB_706_718              | STK     | 0,10405827 | 4,26E-02 |

Table S2. Peptides score table (PTK and STK) of D0 spheroids vs D10 adipospheres.



| Rank | PTK Kinase Name | Mean Final Score | Mean Kinase Statistic |
|------|-----------------|------------------|-----------------------|
| 1    | HCK             | 1,961220128      | 0,460651987           |
| 2    | FGFR1           | 1,86926031       | 0,562869443           |
| 3    | Src             | 1,472683358      | 0,29411269            |
| 4    | KDR             | 1,391021789      | 0,374796464           |
| 5    | CSK             | 1,328089579      | 0,289891645           |
| 6    | FGFR3           | 1,315730624      | 0,452245082           |
| 7    | FGFR4           | 1,311057037      | 0,408545378           |
| 8    | TXK             | 1,305227154      | 0,327402154           |
| Rank | STK Kinase Name | Mean Final Score | Mean Kinase Statistic |
| 1    | DAPK2           | 1,898140805      | 0,449021666           |
| 2    | Akt1/PKB[alpha] | 1,656808643      | 0,229981306           |
| 3    | PKC[theta]      | 1,653460552      | 0,243450872           |
| 4    | GSK3[alpha]     | 1,628074666      | 0,391124939           |
| 5    | PKC[alpha]      | 1,593043453      | 0,223456938           |
| 6    | PKC[delta]      | 1,537349512      | 0,248610717           |
| 7    | AMPK[alpha]1    | 1,512322373      | 0,305743225           |
| 8    | CHK1            | 1,444867338      | 0,302709376           |
| 9    | Akt2/PKB[beta]  | 1,436188077      | 0,222417622           |
| 10   | MSK2            | 1,414384635      | 0,357649245           |
| 11   | GSK3[beta]      | 1,355080135      | 0,3225343             |
| 12   | PKC[zeta]       | 1,34879529       | 0,275297291           |
| 13   | PKN1/PRK1       | 1,330140997      | 0,279499594           |

**Table S3. Kinases score table (PTK and STK) of control vs CDKN2A-deficient D0 spheroids.**

| Peptides           | STK/PTK | LFC        | Pvalue   |
|--------------------|---------|------------|----------|
| PDPK1_369_381      | PTK     | -5,27E-02  | 3,80E-03 |
| CRK_214_226        | PTK     | 0,7016654  | 7,52E-03 |
| CDK1_9_21          | PTK     | -0,3317584 | 1,28E-02 |
| FER_707_719        | PTK     | 0,17346191 | 2,10E-02 |
| PRRX2_202_214      | PTK     | 0,39735985 | 2,43E-02 |
| ZAP70_485_497      | PTK     | 0,30168295 | 4,22E-02 |
| AKT1_309_321_C310S | PTK     | 0,34416914 | 4,36E-02 |
| FRK_380_392        | PTK     | -0,1401911 | 4,60E-02 |
| FES_706_718        | PTK     | 0,15176122 | 4,71E-02 |
| PTN6_531_541       | PTK     | -0,2107744 | 4,89E-02 |
| ANXA1_209_221      | STK     | -0,5602635 | 2,80E-02 |

**Table S4. Peptides score table (PTK and STK) of control vs CDKN2A-deficient D0 spheroids.**

| Rank | PTK Kinase Name | Mean Final Score | Mean Kinase Statistic |
|------|-----------------|------------------|-----------------------|
| 1    | Syk             | 2,294361873      | 0,564046227           |
| 2    | HCK             | 1,890351743      | 0,662544356           |
| 3    | Yes             | 1,864642748      | 0,683415043           |
| 4    | FAK2            | 1,863042834      | 0,66094871            |
| 5    | FAK1            | 1,771613272      | 0,575407491           |
| 6    | CTK             | 1,675012084      | 0,65030287            |
| 7    | EphA2           | 1,591901866      | 0,923746565           |
| 8    | EphA4           | 1,576631078      | 0,951222036           |
| 9    | Lyn             | 1,549545902      | 0,639951533           |
| 10   | Lck             | 1,439150011      | 0,580564358           |
| 11   | Src             | 1,330285568      | 0,552129477           |

| Rank | STK Kinase Name | Mean Final Score | Mean Kinase Statistic |
|------|-----------------|------------------|-----------------------|
| 1    | ERK2            | 3,423870314      | 0,700972037           |
| 2    | ERK1            | 3,205055855      | 0,677369966           |
| 3    | CDK2            | 3,072718153      | 0,609376463           |
| 4    | ERK5            | 2,348087965      | 0,60119793            |
| 5    | PAK1            | 2,311870131      | 0,725189969           |
| 6    | CDK11           | 2,291219104      | 0,805662721           |
| 7    | JNK1            | 2,221518702      | 0,501217777           |
| 8    | JNK3            | 2,206681046      | 0,50144175            |
| 9    | JNK2            | 2,106309256      | 0,519506202           |
| 10   | p38[delta]      | 2,075594885      | 0,526564831           |
| 11   | DAPK3           | 2,07139934       | 0,855769447           |
| 12   | RSK2            | 2,00884815       | 0,617379413           |
| 13   | p38[beta]       | 1,993876061      | 0,654970143           |
| 14   | p38[gamma]      | 1,940728697      | 0,600072794           |
| 15   | CDK3            | 1,894011488      | 0,5366334             |
| 16   | PKN1/PRK1       | 1,856057022      | 0,600441074           |
| 17   | CDK7            | 1,759290209      | 0,531977845           |
| 18   | MSK1            | 1,73670375       | 0,586032711           |
| 19   | CDC2/CDK1       | 1,697895248      | 0,519995668           |
| 20   | BRAF            | 1,616211468      | 0,628644218           |
| 21   | CDK6            | 1,558737821      | 0,585599421           |
| 22   | ARAF            | 1,539487347      | 0,626322331           |
| 23   | RSKL1           | 1,488029394      | 0,592039418           |
| 24   | CDKL2           | 1,459770662      | 0,616678444           |
| 25   | CDK9            | 1,450168809      | 0,550907484           |
| 26   | MAPK14          | 1,440425219      | 0,492400418           |
| 27   | CDK4            | 1,368212912      | 0,544788554           |

**Table S5. Kinases score table (PTK and STK) of control vs CDKN2A-deficient D10 adipospheres.**

| Peptides      | STK/PTK | LFC        | Pvalue   |
|---------------|---------|------------|----------|
| RON_1346_1358 | PTK     | 0,67521787 | 1,49E-03 |
| CD3Z_135_147  | PTK     | 0,57993567 | 5,52E-03 |
| RET_1022_1034 | PTK     | 0,11388135 | 1,21E-02 |
| ZBT16_621_633 | PTK     | 0,69783235 | 2,09E-02 |
| AKT1_320_332  | PTK     | 0,18023205 | 2,25E-02 |
| FES_706_718   | PTK     | 0,15820622 | 2,74E-02 |
| FAK1_569_581  | PTK     | 3,58E-02   | 2,82E-02 |
| K2C6B_53_65   | PTK     | -0,9405434 | 3,75E-02 |
| TAU_524_536   | STK     | 0,51969433 | 1,70E-02 |
| ACM1_444_456  | STK     | 0,25251928 | 3,12E-02 |
| RB_242_254    | STK     | 0,16459639 | 3,42E-02 |
| MARCS_160_172 | STK     | 0,35433802 | 3,75E-02 |
| ACM5_494_506  | STK     | 0,23127301 | 4,34E-02 |
| GSUB_61_73    | STK     | 0,37231508 | 4,96E-02 |

**Table S6. Peptides score table (PTK and STK) of control vs CDKN2A-deficient D10 adipospheres.**
